# Supplementary material for: Impacts of Am Aggregation on the Bulk Properties of Mixed Oxides (U, Am)O<sub>2</sub>
Source: Preprints.org preprint supplement (doi:10.20944/preprints202407.2599.v1), 2024-08-02
Supplement: Supplementary file 1 [file supplementary]

Supplementary Materials for

**Impacts of Am** **aggregation on the bulk properties of mixed oxides (U, Am)O2 from first-principles**

Tao Liu a, [[1]](#footnote-1)*, Ziyi Yang a, Xiaoyan Yu a, Tao Gao b

a *College of Science, Guiyang University, Guiyang, 550005, China*

b*Institute of Atomic and Molecular Physics, Sichuan University, Chengdu, 610065, China*


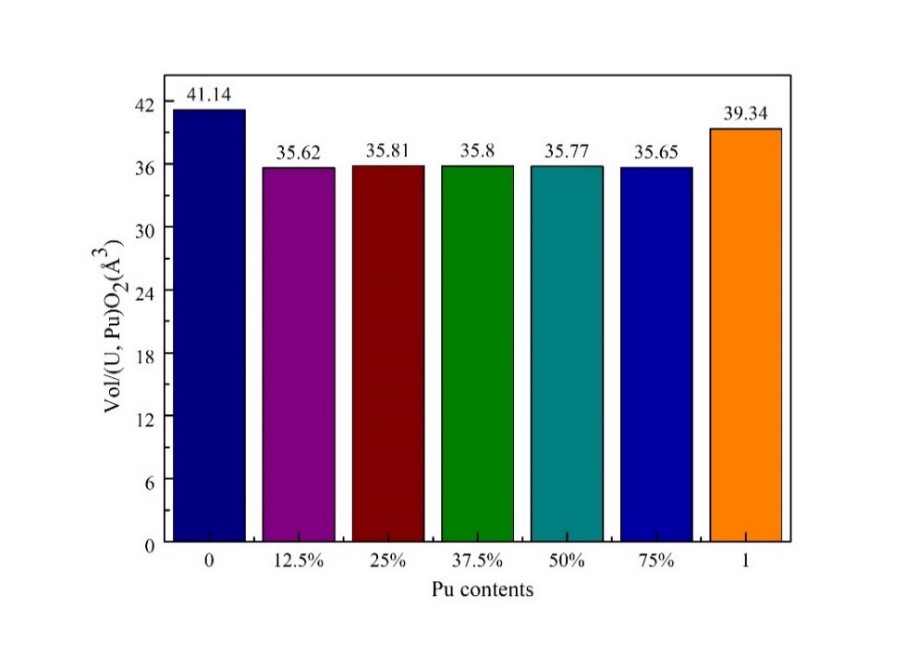


**Fig. S1.** Variation of the systems volume of mixed oxides (U, Pu)O2 with different Pu aggregation contents.


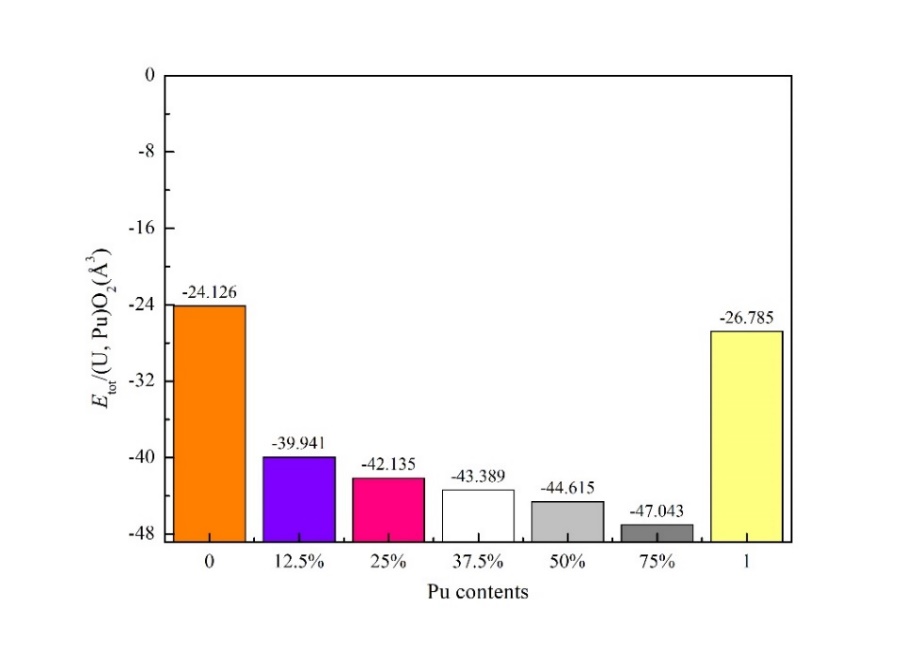


**Fig. S2.** Variation of the energy *E*tot of mixed oxides (U, Pu)O2 with different Pu aggregation contents.

**Table S1**

Magnetic stability including the lattice parameter and band gap of the (U, Pu)O2 defect model for various Pu aggregation contents using PBEsol+*U*.

| Pu content | AFM | | |  | FM | | | *E*FM-*E*AFM/atom  (eV) |
| --- | --- | --- | --- | --- | --- | --- | --- | --- |
|  | *a*0 (Å) | *c*/*a* | *G* (eV) |  | *a*0 (Å) | *c*/*a* | *G* (eV) |  |
| UO2 | 5.480 | 1.0 | 2.0 |  | 5.469 | 1.0 | 1.8 | 0.12 |
| 12.5% | 5.223 | 1.0 | 1.1 |  | 5.222 | 1.0 | 0.9 | 0.00 |
| 25% | 5.233 | 1.0 | 1.1 |  | 5.232 | 1.0 | 0.9 | 0.00 |
| 37.5% | 5.232 | 0.999 | 1.1 |  | 5.232 | 0.998 | 0.9 | 0.00 |
| 50% | 5.230 | 0.998 | 1.0 |  | 5.231 | 0.998 | 0.8 | 0.02 |
| 75% | 5.224 | 0.998 | 0.0 |  | 5.224 | 0.999 | 0.0 | 0.00 |
| PuO2 | 5.399 | 1.0 | 2.0 |  | 5.409 | 1.0 | 1.9 | 0.39 |

**Table S2**

Lattice parameter, band gap, magnetic moment of UO2, PuO2 and (U, Pu)O2 using PBEsol+*U*.

| Pu content | Functional | *a*0（Å） | | *G*（eV） | *μ*mag（*μB*） | *E*FM-*E*AFM/atom  （eV） |
| --- | --- | --- | --- | --- | --- | --- |
|  |  | AFM | FM | AFM | AFM |  |
| UO2 | PBEsol+*U* | 5.480 | 5.469 | 2.0 | 2.0 | +0.12 |
|  | PBE+*U* [2] | 5.543 | 5.547 | 2.5 |  |  |
|  | expt [3] | 5.470 |  | 2.1 |  |  |
| (U0.75Pu0.25)O2 | PBEsol+*U* | 5.223 | 5.222 | 1.1 | 5.4 | 0.00 |
|  | PBE+*U* [2] | 5.520 | 5.520 | 1.2 |  |  |
| (U0.5Pu0.5)O2 | PBEsol+*U* | 5.217 | 5.217 | 1.1 | 5.4 | 0.00 |
|  | PBE+*U* [2] | 5.497 | 5.495 | 1.2 |  |  |
| (U0.25Pu0.75)O2 | PBEsol+*U* | 5.212 | 5.212 | 0.0 | 5.3 | 0.00 |
| PuO2 | PBEsol+*U* | 5.399 | 5.409 | 1.9 | 4.1 | +0.39 |
|  | PBE+*U* [2] | 5.453 | 5.452 | 2.0 |  |  |
|  | expt [3] | 5.398 |  | 1.8 |  |  |

**Table S3**

Energy of formation of UO2, PuO2 and (U, Pu)O2 using PBEsol+*U*.

|  | *Ef*（eV） | | | | |
| --- | --- | --- | --- | --- | --- |
| Compound | expt | CALPHAD | PBE+*U*[2] | vdW-optPBE+*U*[2] | PBEsol+*U* |
| UO2 | -11.24 [4] | -11.23[6] | -10.86 | -11.27 | -11.78 |
| (U0.75Pu0.25)O2 |  |  | -10.69 | -11.18 | -14.65 |
| (U0.5Pu0.5)O2 |  |  | -10.51 | -11.09 | -14.19 |
| (U0.25Pu0.75)O2 |  |  | -10.33 | -10.99 | -13.73 |
| PuO2 | -10.94 [5] | -10.99[7] | -10.10 | -10.90 | -11.34 |

**Table S4**

Elastic constants and bulk modulus of (U, Pu)O2 using PBEsol+*U*.

|  | Functional | UO2 | (U0.75Pu0.25)O2 | (U0.5Pu0.5)O2 | (U0.25Pu0.75)O2 | PuO2 |
| --- | --- | --- | --- | --- | --- | --- |
| *C*11（GPa） | PBEsol+*U* | 383 | 378 | 357 | 349 | 387 |
|  | PBE+*U* [2] | 364 | 375 | 365 | 368 | 375 |
|  | LDA+*U* [1] | 401 |  |  |  |  |
|  | expt [4] | 389 |  |  |  |  |
| *C*12（GPa） | PBEsol+*U* | 126 | 101 | 99 | 98 | 126 |
|  | PBE+*U* [2] | 112 | 108 | 116 | 115 | 111 |
|  | LDA+*U* [1] | 132 |  |  |  |  |
|  | expt [4] | 119 |  |  |  |  |
| *C*44（GPa） | PBEsol + *U* | 72 | 51 | 44 | 30 | 71 |
|  | PBE+*U* [2] | 58 | 62 | 66 | 68 | 70 |
|  | LDA+*U* [1] | 94 |  |  |  |  |
|  | expt [4] | 60 |  |  |  |  |
| *B*0（GPa） | PBEsol+*U* | 212 | 193 | 185 | 182 | 199 |
|  | PBE+*U* [2] | 196 | 197 | 199 | 199 | 199 |
|  | LDA+*U* [1] | 222 | 235 |  |  | 208 |
|  | expt [4] | 207 | 156.9-221 |  |  | 178 |

**Declaration of competing interest**

The authors declare that they have no known competing ﬁnancial interests or personal relationships that could have appeared to inﬂuence the work reported in this paper.

**Data availability**

No data was used for the research described in the article.

**Acknowledgements**

Financial support from the National Natural Science Foundation of China (Grant No.

12264007) is acknowledged.

**References**

[1] B. Dorado, P. Garcia, First-principles DFT+*U* modeling of actinide-based alloys: Application to paramagnetic phases of UO2 and (U, Pu) mixed oxides, Phys. Rev. B 87 (2013) 195139, https:// https://doi.org/10.1103/PhysRevB.87.195139.

[2] I.C. Njifon, M. Bertolus, R, Hayn, F. Michel, Electronic structure investigation of the bulk properties of uranium-plutonium mixed oxides (U, Pu)O2, Inorg. Chem. 57 (2018) 10974-10983, <https://doi.org/10.1021/acs.inorgchem.8b01561>.

[3] P. Martin, S. Grandjean, C. Valot, G. Carlot, M. Ripert, P. Blanc, C. Hennig, XAS study of (U1−*y*Pu*y*)O2 solid solutions, J. Alloys Compnd. 444 (2007) 410-414,

<https://doi.org/10.1016/j.jallcom.2007.01.032>.

[4] E.J. Huber, C.E. Holley, Enthalpies of formation of triuranium octaoxide and uranium dioxide, J. Chem. Thermodyn. 1 (1969) 267-272, https://doi.org/10.1016/0021-9614(69)90046-9.

[5] G.K. Johnson, E.H. Van Deventer, O.L. Kruger, W. N. Hubbard, The enthalpies of formation of plutonium dioxide and plutonium mononitride, J. Chem. Thermodyn. 1 (1969) 89-98, https://doi.org/10.1016/0021-9614(69)90039-1.

[6] C. Guéneau, M. Baichi, D. Labroche, C. Chatillon, B. Sundman, Thermodynamic assessment of the uranium-oxygen system, J. Nucl. Mater. 304 (2002) 161-175, https://doi.org/10.1016/S0022-3115(02)00878-4.

[7] C. Guéneau, C. Chatillon, B. Sundman, Thermodynamic modelling of the plutonium-oxygen system, J. Nucl. Mater. 378 (2008) 257-272, https://doi.org/10.1016/j.jnucmat.2008.06.013.

1. * Corresponding author.

   *E-mail address:* * liutao_july@163.com (T. Liu). [↑](#footnote-ref-1)
